# Supplementary material for: Cell Count Differentials by Cytomorphology and Next-Generation Flow Cytometry in Bone Marrow Aspirate: An Evidence-Based Approach
Source: MDPI journal article supplement (doi:10.3390/diagnostics13061071), 2023-03-11
Supplement: s1 [file s1]

**CELL COUNT DIFFERENTIALS BY CYTOMORPHOLOGY AND NEXT-GENERATION FLOW CYTOMETRY IN BONE MARROW ASPIRATE: AN EVIDENCE-BASED APPROACH**

**SUPPLEMENTARY MATERIAL**

**Table S1. Monoclonal antibodies reagents used for the immunophenotypic characterization.**

| <b>Mab</b> | <b>Conjugates</b> |
|------------|-------------------|
| CD2        | FITC              |
| HLA-DR     | FITC              |
| CD11b      | FITC              |
| CD14       | PE                |
| CD34       | PE                |
| CD13PE     | PE                |
| CD4        | PerCP-Cy5.5       |
| CD10       | PerCP-Cy5.5       |
| HLA-DR     | PerCP-Cy5.5       |
| CD7        | APC               |
| CD33       | APC               |
| CD34       | APC               |
| CD56       | PE-CY7            |
| CD19       | PE-CY7            |
| CD117      | PE-CY7            |
| CD8        | APC-H7            |
| CD38       | APC-H7            |
| CD71       | APC-H7            |
| CD3        | V450              |
| CD20       | V450              |

|      |      |
|------|------|
| CD15 | V450 |
| CD45 | V500 |

Abbreviations: AF: alexa fluor; APC: allophycocyanin; BB: brilliant blue 515; BV: brilliant violet, FITC: fluorescein isothiocyanate; Mab: monoclonal antibodies; PE: phycoerythrin; PerCP-Cy5.5: peridinin chlorophyll protein-cyanine 5.5.

**Table S2. Final diagnosis in the complete set and the control group, %.**

| <b>DISEASE</b> | <b>COMPLETE SET<br/>n=660</b> | <b>CONTROL GROUP<br/>n=122</b> |
|----------------|-------------------------------|--------------------------------|
| AML            | 17.6                          | 25.4                           |
| MM             | 15.6                          | 24.6*                          |
| MDS            | 15.5                          | 4.1                            |
| LYM            | 14.2                          | 16.4                           |
| MGUS           | 10.5                          | *                              |
| ALL            | 7.6                           | 5.7                            |
| CMPD           | 4.5                           | 7.4                            |
| OTHER          | 14.5                          | 16.4                           |

Abbreviations: ALL: acute myeloid leukemia; AML: acute myeloid leukemia; CMPD: chronic myeloproliferative disease; LYM: lymphomas; MGUS: monoclonal gammopathy of uncertain significance; MM: multiple myeloma. \*this percentage is presented together with MM in the control group.

**Table S3. Comparison by Regression Linear analysis between BMCS 200-cell and 500-cell DCC versus IP FDC results for the complete set according to cell type\***

| <b>CELL TYPE</b> | <b>n</b> | <b>R<sup>2</sup></b> | <b>Slope</b> | <b>Intercept</b> |
|------------------|----------|----------------------|--------------|------------------|
| Blast 200        | 424      | 0.863                | 0,939        | -,051            |
| Blast 500        | 424      | 0.897                | 0,960        | -,033            |
| Promyelocyte 200 | 102      | 0.955                | 1,007        | -,763            |
| Promyelocyte 500 | 102      | 0.966                | 1,006        | -,675            |
| Erythroblast 200 | 189      | 0.453                | 1,221        | 12,401           |
| Erythroblast 500 | 189      | 0.465                | 1,201        | 13,774           |
| Lymphocyte 200   | 235      | 0.590                | 0,628        | ,895             |
| Lymphocyte 500   | 235      | 0.650                | 0,726        | -,093            |
| Plasma cell 200  | 343      | 0.921                | 1,436        | -,026            |
| Plasma cell 500  | 343      | 0.917                | 1,427        | -,002            |
| Monocyte 200     | 390      | 0.662                | 1,081        | -,063            |
| Monocyte 500     | 390      | 0.683                | 1,115        | -,471            |

\*All associates p values are significant at <.000

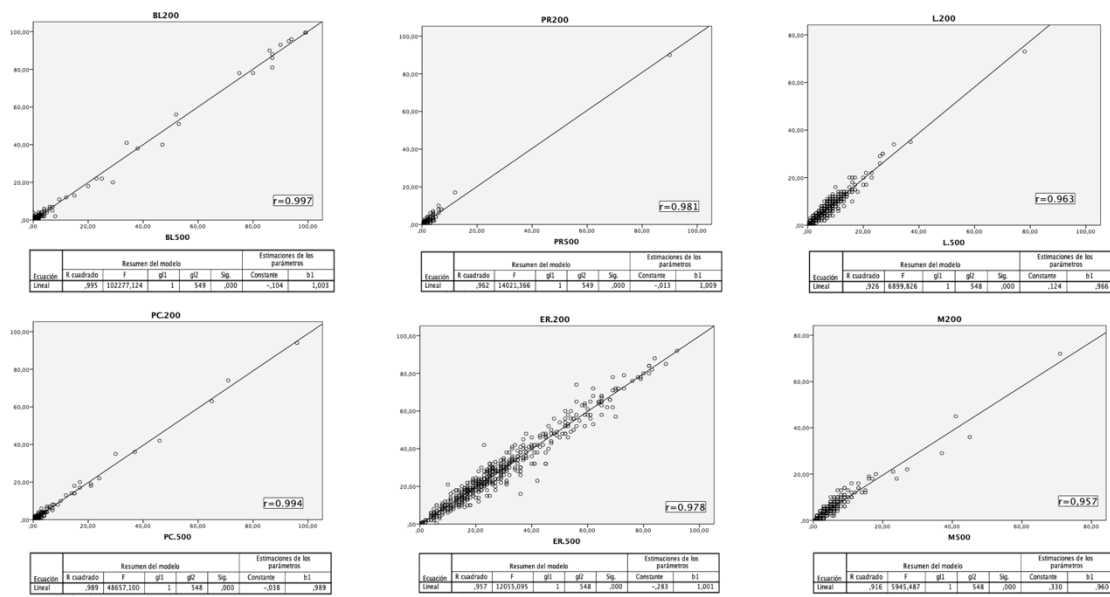

**Figure S1. Linear Regression analysis for the complete set, 200-cell vs 500-cell DCC**

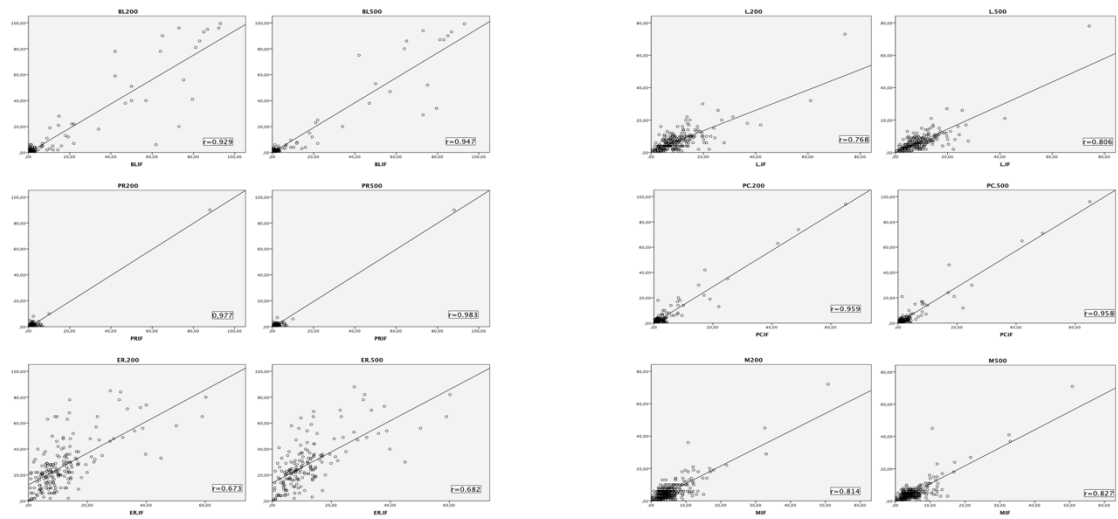

**Figure S2. Linear Regression analysis for the complete set comparison between 200-cell and 500-cell DCC and immunophenotype**
